# Supplementary material
Source: PubMed Central journal article supplement (PMC6645240)
Supplement: ao8b01139_si_001.pdf [file ao8b01139_si_001.pdf]

# Osteogenic Differentiation of Bone Marrow-Derived Mesenchymal Stem Cells in Electrospun Silica Nonwoven Fabrics

*Kazutoshi Iijima,<sup>†,1</sup> Shohei Ishikawa,<sup>‡</sup> Kohei Sasaki,<sup>§</sup> Mineo Hashizume,<sup>†</sup> Masaaki Kawabe,<sup>§</sup>  
and Hidenori Otsuka<sup>‡,¶,\*</sup>*

<sup>†</sup> Department of Industrial Chemistry, Faculty of Engineering, Tokyo University of Science,  
12-1 Ichigayafunagawara-machi, Shinjuku-ku, Tokyo 162-0826, Japan

<sup>‡</sup> Graduate School of Science, Tokyo University of Science, 1-3 Kagurazaka, Shinjuku-ku,  
Tokyo 162-8601, Japan.

<sup>§</sup> Japan Vilene Company Ltd., 7 kita-Tone, Koga, Ibaraki 306-0213, Japan.

<sup>¶</sup> Department of Applied Chemistry, Faculty of Science, Tokyo University of Science, 1-3  
Kagurazaka, Shinjuku-ku, Tokyo 162-8601, Japan.

Silica, Nonwoven Fabrics, Mesenchymal Stem Cell, Osteogenesis

Supporting Information.

---

<sup>1</sup> Present Address: Faculty of Engineering, Yokohama National University, 79-5 Tokiwadai,  
Hodogaya-ku, Yokohama 240-8501, Japan

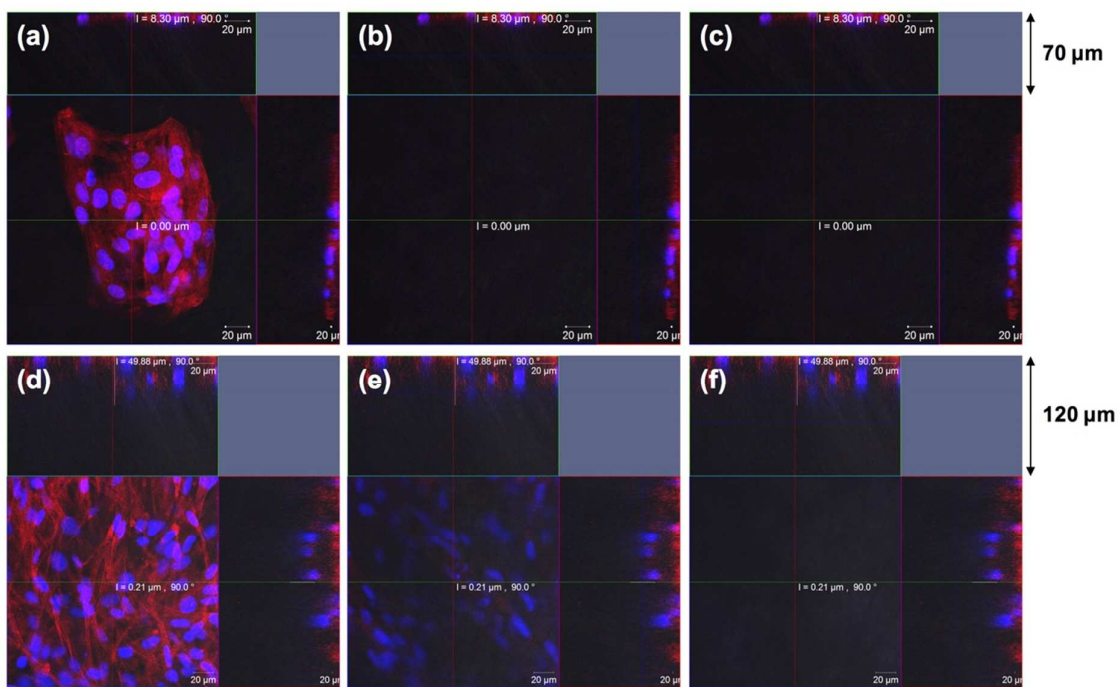

**Figure S1.** Confocal-laser scanning microscope (CLSM) images showing proliferation of MSCs on 3D silica nonwoven fabrics 7 days (a, b, c) and 14 days (d, e, f) after seeding at cell density of  $3 \times 10^4$ . In each case, single optical slices near to the silica fabric surface (1.76  $\mu\text{m}$ , a, d), middle (36.96  $\mu\text{m}$ , b, e) and near bottom (66.87  $\mu\text{m}$ , c, f) were shown. Cellular nuclei and skeletons were stained with Hoechst 33342 (blue) and Alexa Fluor 594 phalloidin (red), respectively. Scale bars: 20  $\mu\text{m}$ .

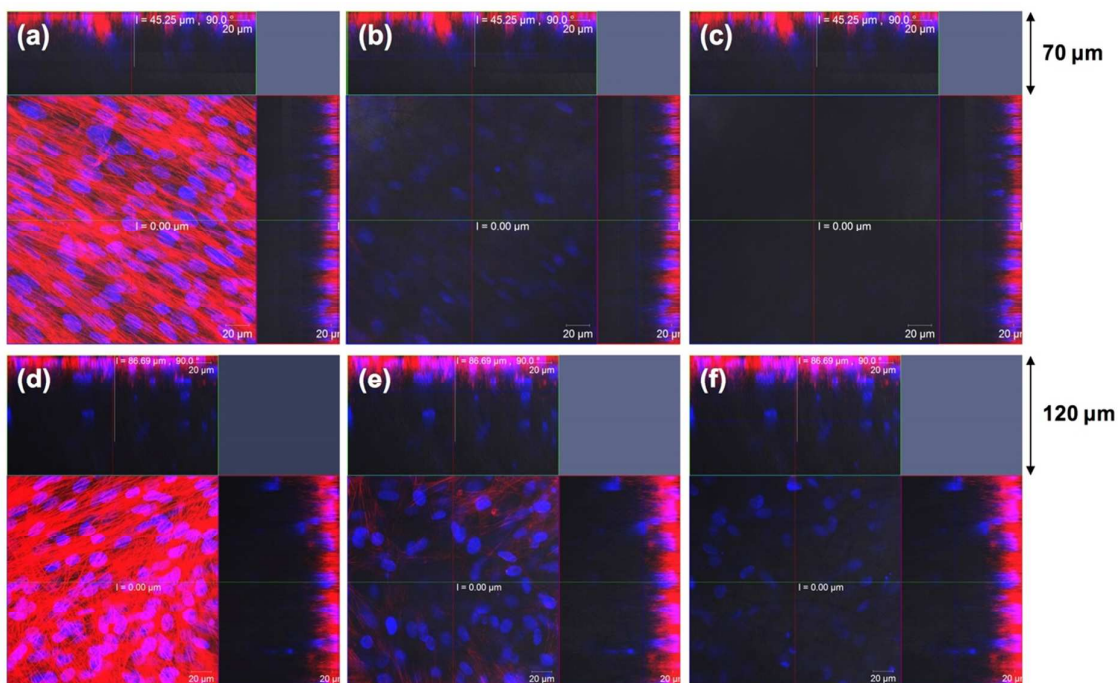

**Figure S2.** Confocal-laser scanning microscope (CLSM) images showing proliferation of MSCs on 3D silica nonwoven fabrics 7 days (a, b, c) and 14 days (d, e, f) after seeding at cell density of  $3 \times 10^5$ . In each case, single optical slices near to the silica fabric surface (1.76  $\mu\text{m}$ , a, d), middle (36.96  $\mu\text{m}$ , b, e) and near bottom (66.87  $\mu\text{m}$ , c, f) were shown. Cellular nuclei and skeletons were stained with Hoechst 33342 (blue) and Alexa Fluor 594 phalloidin (red), respectively. Scale bars: 20  $\mu\text{m}$ .
